# Supplementary material for: Mycobacterium tuberculosis Beijing Lineage and Risk for Tuberculosis in Child Household Contacts, Peru
Source: PubMed Central journal article supplement (PMC7045848; doi:10.3201/eid2603.191314), 2020-03
Supplement: 19-1314-Techapp-s1.pdf [file 19-1314-Techapp-s1.pdf]

# *Mycobacterium tuberculosis* Beijing Lineage and Risk for Tuberculosis in Child Household Contacts, Peru

## Appendix

**Appendix Table 1.** Baseline characteristics of child household contacts by baseline *Mycobacterium tuberculosis* infection status

| Variable                                | Uninfected, no. (%) <sup>*</sup> | Infected, no. (%) <sup>*</sup> | p value <sup>†</sup> |
|-----------------------------------------|----------------------------------|--------------------------------|----------------------|
| Age, y                                  |                                  |                                |                      |
| 0–5                                     | 1,066 (47)                       | 286 (34)                       | <0.001               |
| 6–10                                    | 644 (28)                         | 262 (31)                       |                      |
| 11–15                                   | 564 (25)                         | 293 (35)                       |                      |
| Sex, M                                  | 1,159 (51)                       | 407 (48)                       | 0.211                |
| HIV seropositive                        | 3 (<1)                           | 0                              | 0.568                |
| Self-reported diabetes                  | 1 (<1)                           | 1 (<1)                         | 0.465                |
| Current smoker                          | 2 (<1)                           | 2 (<1)                         | 0.296                |
| <i>M. tuberculosis</i> lineage exposure |                                  |                                |                      |
| L2 (Beijing)                            | 223 (10)                         | 110 (13)                       | <0.001               |
| L4.1                                    | 912 (40)                         | 382 (45)                       |                      |
| L4.3                                    | 891 (39)                         | 272 (32)                       |                      |
| Other                                   | 248 (11)                         | 77 (9)                         |                      |
| Presence of <i>M. bovis</i> BCG scar    | 1,847 (81)                       | 675 (80)                       | 0.538                |
| Nutritional status                      |                                  |                                |                      |
| Normal weight                           | 1775 (79)                        | 667 (80)                       | 0.178                |
| Underweight                             | 71 (3)                           | 16 (2)                         |                      |
| Overweight                              | 399 (18)                         | 151 (18)                       |                      |
| Socioeconomic status                    |                                  |                                |                      |
| Low                                     | 846 (38)                         | 350 (43)                       | 0.038                |
| Middle                                  | 1,012 (45)                       | 336 (41)                       |                      |
| High                                    | 373 (17)                         | 127 (16)                       |                      |
| Isoniazid preventive therapy recipient  | 1,193 (52)                       | 437 (52)                       | 0.809                |

<sup>\*</sup>Total number varied because of missing data.

<sup>†</sup> $\chi^2$ -square test p value.

**Appendix Table 2.** Baseline characteristics of adult household contacts by baseline *Mycobacterium tuberculosis* infection status

| Variable                                | Uninfected, no. (%) <sup>*</sup> | Infected, no. (%) <sup>*</sup> | p value <sup>†</sup> |
|-----------------------------------------|----------------------------------|--------------------------------|----------------------|
| Age, y                                  |                                  |                                |                      |
| 16–30                                   | 1,263 (48)                       | 1,097 (36)                     | 0.001                |
| 31–45                                   | 682 (26)                         | 871 (29)                       |                      |
| 46–60                                   | 413 (16)                         | 717 (24)                       |                      |
| >60                                     | 298 (11)                         | 322 (11)                       |                      |
| Sex, M                                  | 1,122 (42)                       | 1,288 (43)                     | 0.674                |
| HIV seropositive                        | 7 (<1)                           | 19 (1)                         | 0.067                |
| Self-reported diabetes                  | 63 (2)                           | 93 (3)                         | 0.11                 |
| Current smoker                          | 219 (8)                          | 304 (10)                       | 0.015                |
| <i>M. tuberculosis</i> lineage exposure |                                  |                                |                      |
| L2 (Beijing)                            | 309 (12)                         | 353 (12)                       | 0.574                |
| L4.1                                    | 1,050 (40)                       | 1,240 (41)                     |                      |
| L4.3                                    | 1,015 (38)                       | 1,108 (37)                     |                      |
| Other                                   | 282 (11)                         | 306 (10)                       |                      |
| Presence of <i>M. bovis</i> BCG scar    | 2,321 (87)                       | 2,704 (90)                     | 0.003                |
| Nutritional status                      |                                  |                                |                      |
| Normal weight                           | 1,337 (51)                       | 1,276 (43)                     | 0.001                |
| Underweight                             | 23 (1)                           | 42 (1)                         |                      |
| Overweight                              | 1,272 (48)                       | 1,664 (56)                     |                      |
| Socioeconomic status                    |                                  |                                |                      |
| Low                                     | 781 (30)                         | 1,001 (34)                     | 0.007                |
| Middle                                  | 1,214 (47)                       | 1,289 (44)                     |                      |
| High                                    | 594 (23)                         | 646 (22)                       |                      |
| Isoniazid preventive therapy recipient  | 224 (8)                          | 169 (6)                        | 0.001                |

<sup>\*</sup>Total number varied because of missing data.

<sup>†</sup>χ<sup>2</sup>-square test p value.

**Appendix Table 3.** Baseline characteristics of child household contacts by incident tuberculosis status

| Variable                                        | Disease free, no. (%) <sup>*</sup> | Secondary tuberculosis, no. (%) <sup>*</sup> | p value <sup>†</sup> |
|-------------------------------------------------|------------------------------------|----------------------------------------------|----------------------|
| Age, y                                          |                                    |                                              |                      |
| 0–5                                             | 1,350 (44)                         | 57 (40)                                      | 0.027                |
| 6–10                                            | 898 (29)                           | 33 (33)                                      |                      |
| 11–15                                           | 834 (27)                           | 53 (37)                                      |                      |
| Sex, M                                          | 1,545 (50)                         | 75 (52)                                      | 0.648                |
| HIV seropositive                                | 3 (<1)                             | 0                                            | 0.999                |
| Self-reported diabetes                          | 2 (<1)                             | 0                                            | 0.999                |
| Current smoker                                  | 4 (<1)                             | 0                                            | 0.999                |
| Presence of <i>Mycobacterium bovis</i> BCG scar | 2,498 (81)                         | 112 (87)                                     | 0.477                |
| Nutritional status                              |                                    |                                              |                      |
| Normal weight                                   | 2,404 (79)                         | 123 (87)                                     | 0.081                |
| Underweight                                     | 93 (3)                             | 2 (1)                                        |                      |
| Overweight                                      | 548 (18)                           | 17 (12)                                      |                      |
| Socioeconomic status                            |                                    |                                              |                      |
| Low                                             | 1,192 (40)                         | 61 (44)                                      | 0.604                |
| Middle                                          | 1,325 (44)                         | 59 (42)                                      |                      |
| High                                            | 494 (16)                           | 20 (14)                                      |                      |
| Isoniazid preventive therapy recipient          | 1,641 (53)                         | 40 (28)                                      | <0.001               |

<sup>\*</sup>Total number varied because of missing data.

<sup>†</sup>χ<sup>2</sup>-square test p value.

**Appendix Table 4.** Baseline characteristics of adult household contacts by incident tuberculosis status

| Variable                                        | Disease free, no. (%) <sup>*</sup> | Secondary tuberculosis, no. (%) <sup>*</sup> | p value <sup>†</sup> |
|-------------------------------------------------|------------------------------------|----------------------------------------------|----------------------|
| Age, y                                          |                                    |                                              |                      |
| 16–30                                           | 2,304 (41)                         | 153 (53)                                     | 0.001                |
| 31–45                                           | 1,560 (28)                         | 61 (21)                                      |                      |
| 46–60                                           | 1,137 (20)                         | 46 (16)                                      |                      |
| >60                                             | 619 (11)                           | 30 (10)                                      |                      |
| Sex, M                                          | 2,356 (42)                         | 159 (55)                                     | <0.001               |
| HIV seropositive                                | 26 (<1)                            | 4 (1)                                        | 0.086                |
| Self-reported diabetes                          | 153 (3)                            | 9 (3)                                        | 0.838                |
| Current smoker                                  | 524 (9)                            | 26 (9)                                       | 0.91                 |
| Presence of <i>Mycobacterium bovis</i> BCG scar | 4,991 (89)                         | 247 (85)                                     | 0.067                |
| Nutritional status                              |                                    |                                              |                      |
| Normal weight                                   | 2,536 (46)                         | 190 (66)                                     | <0.001               |
| Underweight                                     | 55 (1)                             | 13 (5)                                       |                      |
| Overweight                                      | 2,979 (53)                         | 84 (29)                                      |                      |
| Socioeconomic status                            |                                    |                                              |                      |
| Low                                             | 1,749 (32)                         | 106 (37)                                     | 0.117                |
| Middle                                          | 2,473 (45)                         | 122 (43)                                     |                      |
| High                                            | 1,259 (23)                         | 55 (19)                                      |                      |
| Isoniazid preventive therapy recipient          | 403 (7)                            | 6 (2)                                        | <0.001               |

<sup>\*</sup>Total number varied because of missing data.

<sup>†</sup>χ-square test p value.

**Appendix Table 5.** Effect of the *Mycobacterium tuberculosis* Beijing lineage on the risk for tuberculin skin test positivity at baseline in child and adult household contacts<sup>\*</sup>

| Lineage     | Age ≤15 y, n = 2,981                          |                     |                           | Age >15 y, n = 4,968                          |                     |                           |
|-------------|-----------------------------------------------|---------------------|---------------------------|-----------------------------------------------|---------------------|---------------------------|
|             | Prevalence of infection, no. (%) <sup>†</sup> | Rate ratio (95% CI) |                           | Prevalence of infection, no. (%) <sup>†</sup> | Rate ratio (95% CI) |                           |
|             |                                               | Univariate          | Multivariate <sup>‡</sup> |                                               | Univariate          | Multivariate <sup>‡</sup> |
| Non-Beijing | 619 (23)                                      | Referent            | Referent                  | 2,022 (46)                                    | Referent            | Referent                  |
| Beijing     | 88 (28)                                       | 1.27 (1.06–1.53)    | 1.22 (0.99–1.52)          | 290 (48)                                      | 1.03 (0.94–1.14)    | 1.03 (0.93–1.14)          |

Excludes household contacts with history of tuberculosis, history of previous positive tuberculin skin test, or history of tuberculosis treatment.

<sup>†</sup>Prevalence of baseline *M. tuberculosis* infection univariate model.

<sup>‡</sup>Multivariate model adjusted for index patient drug resistance profile; index patient age (16–30, 31–45, 46–60, and >60 y); index patient HIV status; household contact age (0–5, 6–10, 11–15, 16–30, 31–45, 46–60, and >60 y); household contact *M. bovis* BCG status; household contact socioeconomic status; household contact nutritional status.

**Appendix Table 6.** Effect of the *Mycobacterium tuberculosis* Beijing lineage on the risk for tuberculin skin test positivity by 12 months of follow-up in child and adult household contacts<sup>\*</sup>

| Lineage     | Age ≤5 y, n = 2,387                           |                     |                           | >15 Years (n = 4,716)                         |                     |                           |
|-------------|-----------------------------------------------|---------------------|---------------------------|-----------------------------------------------|---------------------|---------------------------|
|             | Prevalence of infection, no. (%) <sup>†</sup> | Risk ratio (95% CI) |                           | Prevalence of infection, no. (%) <sup>†</sup> | Risk ratio (95% CI) |                           |
|             |                                               | Univariate          | Multivariate <sup>‡</sup> |                                               | Univariate          | Multivariate <sup>‡</sup> |
| Non-Beijing | 986 (47)                                      | Referent            | Referent                  | 2,914 (79)                                    | Referent            | Referent                  |
| Beijing     | 88 (56)                                       | 1.21 (1.07–1.37)    | 1.23 (1.08–1.41)          | 411 (80)                                      | 1.03 (0.94–1.14)    | 1.02 (0.97–1.08)          |

<sup>\*</sup>Excludes household contacts with history of tuberculosis, history of previous positive tuberculin skin test, or history of tuberculosis.

<sup>†</sup>Prevalence of *M. tuberculosis* infection at 12 months for the univariate model.

<sup>‡</sup>Multivariate model adjusted for index patient drug resistance profile; index patient age (16–30, 31–45, 46–60, and >60 y); index patient HIV status; household contact age (0–5, 6–10, 11–15, 16–30, 31–45, 46–60, and >60 y); household contact *M. bovis* BCG status; household contact socioeconomic status; household contact nutritional status.

**Appendix Table 7.** Comparison of hazard ratios for tuberculin skin test conversion between household contacts exposed to *Mycobacterium tuberculosis* Beijing lineage and non-Beijing lineage<sup>\*</sup>

| Lineage     | Age ≤5 y               |                       |                           | Age >15 y              |                       |                           |
|-------------|------------------------|-----------------------|---------------------------|------------------------|-----------------------|---------------------------|
|             | Incidence <sup>†</sup> | Hazard ratio (95% CI) |                           | Incidence <sup>†</sup> | Hazard ratio (95% CI) |                           |
|             |                        | Univariate            | Multivariate <sup>‡</sup> |                        | Univariate            | Multivariate <sup>‡</sup> |
| Non-Beijing | 0.32 (370/1,162)       | Referent              | Referent                  | 0.69 (749/1,084)       | Referent              | Referent                  |
| Beijing     | 0.47 (62/132)          | 1.46 (1.05–2.02)      | 1.63 (1.16–2.28)          | 0.73 (105/142)         | 1.04 (0.83–1.32)      | 1.07 (0.84–1.36)          |

<sup>\*</sup>>6 mm increment in tuberculin skin test induration size.

<sup>†</sup>Cases per person-year for the univariate model.

<sup>‡</sup>Multivariate model adjusted for index patient drug resistance profile; index patient age (16–30, 31–45, 46–60, and >60 y); index patient HIV status; household contact age (0–5, 6–10, 11–15, 16–30, 31–45, 46–60, and >60 y); household contact *M. bovis* BCG status; household contact socioeconomic status; household contact nutritional status.

**Appendix Table 8.** Comparison of hazard ratios for incident tuberculosis\* between contacts exposed to *Mycobacterium tuberculosis* Beijing lineage and non-Beijing lineage

| Lineage     | Age ≤15 y        |                       |                  | Age >15 y         |                       |                  |
|-------------|------------------|-----------------------|------------------|-------------------|-----------------------|------------------|
|             | Incidence†       | Hazard ratio (95% CI) |                  | Incidence†        | Hazard ratio (95% CI) |                  |
|             |                  | Univariate            | Multivariate‡    |                   | Univariate            | Multivariate‡    |
| Non-Beijing | 2,151 (61/2,836) | Referent              | Referent         | 2,264 (113/4,991) | Referent              | Referent         |
| Beijing     | 3,478 (12/345)   | 1.57 (0.41–6.00)      | 1.48 (0.74–2.95) | 2,118 (14/661)    | 0.92 (0.52–1.65)      | 1.02 (0.56–1.88) |

\*Tuberculosis diagnosed ≥30 days after the diagnosis in the index patient.

†Cases per 100,000 person-year for the univariate model.

‡Multivariate model adjusted for index patient drug resistance profile; index patient age (16–30, 31–45, 46–60, and >60 y); index patient HIV status; household contact age (0–5, 6–10, 11–15, 16–30, 31–45, 46–60, and >60 y); household contact *M. bovis* BCG status; household contact socioeconomic status; household contact nutritional status; household contact use of Isoniazid preventive therapy; household contact tuberculosis history.

**Appendix Table 9.** *Mycobacterium bovis* BCG status among household contacts of culture-positive index patients, by nutritional status and socioeconomic status

| Variable             | Non-BCG recipients, no. (%) | BCG recipients, no. (%) | p value* |
|----------------------|-----------------------------|-------------------------|----------|
| Child contacts       |                             |                         |          |
| Nutritional status   |                             |                         |          |
| Normal weight        | 488 (81)                    | 2,038 (79)              | 0.536    |
| Underweight          | 16 (3)                      | 79 (3)                  |          |
| Overweight           | 99 (16)                     | 466 (18)                |          |
| Socioeconomic status |                             |                         |          |
| Low                  | 241 (40)                    | 1,012 (40)              | 0.237    |
| Middle               | 273 (46)                    | 1,111 (44)              |          |
| High                 | 84 (14)                     | 430 (17)                |          |
| Adult contacts       |                             |                         |          |
| Nutritional status   |                             |                         |          |
| Normal weight        | 385 (58)                    | 2,348 (45)              | <0.001   |
| Underweight          | 16 (2)                      | 52 (1)                  |          |
| Overweight           | 265 (40)                    | 2,805 (54)              |          |
| Socioeconomic status |                             |                         |          |
| Low                  | 208 (32)                    | 1,649 (32)              | 0.6      |
| Middle               | 304 (47)                    | 2,303 (45)              |          |
| High                 | 139 (21)                    | 1,174 (23)              |          |

\* $\chi^2$ -square test p value.
